# Supplementary material for: Abatacept used in combination with non-methotrexate disease-modifying antirheumatic drugs: a descriptive analysis of data from interventional trials and the real-world setting
Source: Springer Nature journal article supplement (doi:10.1186/s13075-017-1488-5), 2018-01-01
Supplement: MOESM1 [file 15365728]

## **Additional file 1**

**Supplementary Fig 1.** Mean change from baseline in HAQ-DI scores in response to abatacept administered in combination with one csDMARD from the **(a)** ATTAIN, **(b)** ASSURE, and **(c)** ARRIVE studies. Excludes patients on multiple background csDMARDs. Error bars show 95% CI. ABA, abatacept; AZA, azathioprine; CI, confidence interval; csDMARD, conventional synthetic disease-modifying antirheumatic drug; HAQ-DI, Health Assessment Questionnaire-Disability Index; HCQ, hydroxychloroquine; LEF, leflunomide; MTX, methotrexate; SSZ, sulfasalazine.
