# Supplementary material for: Abatacept used in combination with non-methotrexate disease-modifying antirheumatic drugs: a descriptive analysis of data from interventional trials and the real-world setting
Source: Springer Nature journal article supplement (doi:10.1186/s13075-017-1488-5), 2018-01-01

## Additional file 2

**Supplementary Fig 2.** Mean change from baseline in DAS28 (CRP) at 6 months in response to abatacept administered in combination with one csDMARD from the **(a)** ATTAIN and **(b)** ARRIVE studies. Excludes patients on multiple background csDMARDs. Error bars show 95% CI. ABA, abatacept; AZA, azathioprine; CI, confidence interval; csDMARD, conventional synthetic disease-modifying antirheumatic drug; DAS28, 28-joint Disease Activity Score; CRP, C-reactive protein; HCQ, hydroxychloroquine; LEF, leflunomide; MTX, methotrexate; SSZ, sulfasalazine.

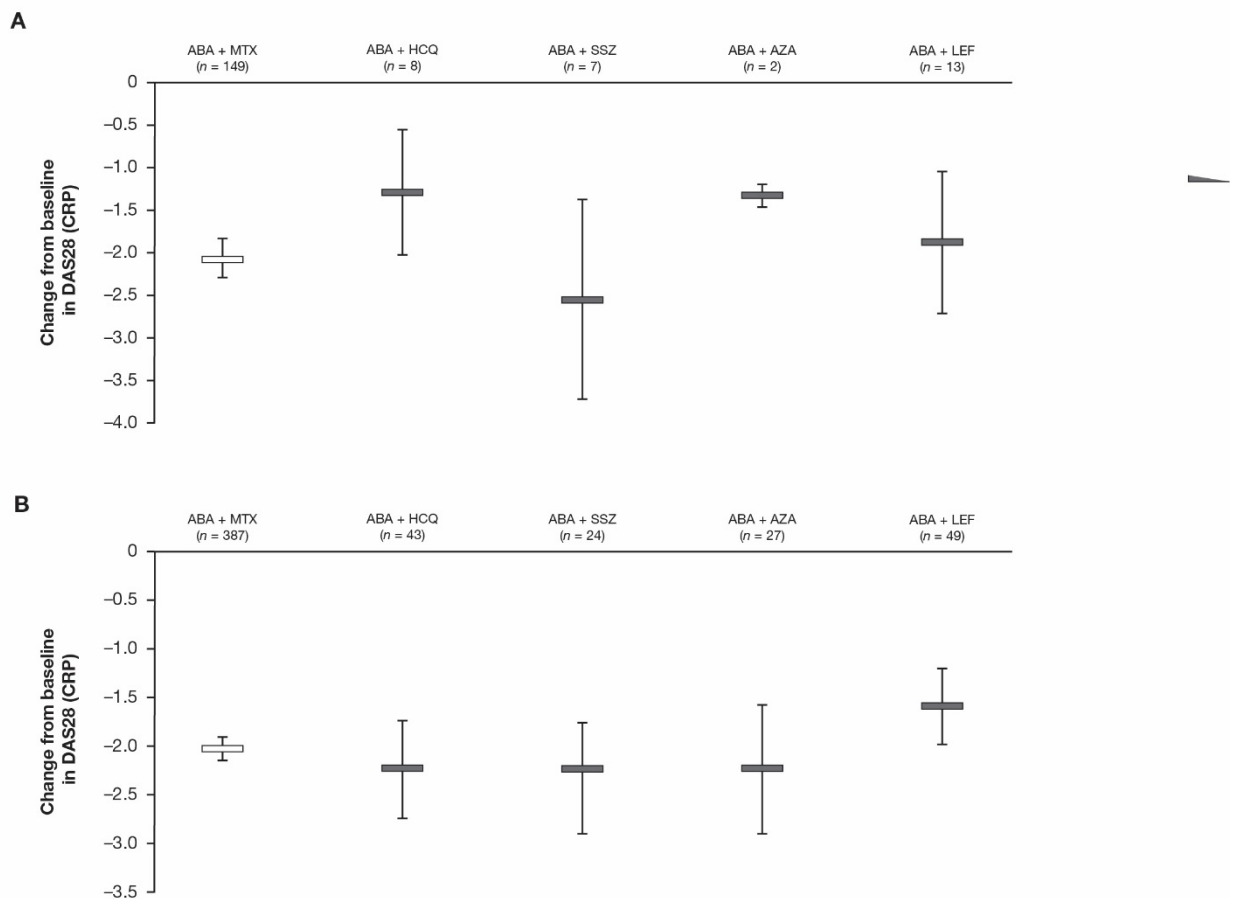

Supplement: MOESM2 [file 15365728]
