# Supplementary material for: Abatacept used in combination with non-methotrexate disease-modifying antirheumatic drugs: a descriptive analysis of data from interventional trials and the real-world setting
Source: Springer Nature journal article supplement (doi:10.1186/s13075-017-1488-5), 2018-01-01
Supplement: MOESM3 [file 15365728]

**Additional file 3**

**Supplementary Table 1.** Safety of csDMARDs administered in combination with abatacept in the ATTAIN, ASSURE and ARRIVE studies

|                                                    | <b>ATTAIN</b>    |                  |                  |                  |                  |                  |
|----------------------------------------------------|------------------|------------------|------------------|------------------|------------------|------------------|
|                                                    | <b>ABA + MTX</b> | <b>ABA + HCQ</b> | <b>ABA + SSZ</b> | <b>ABA + AZA</b> | <b>ABA + LEF</b> | <b>ABA + all</b> |
|                                                    | <b>(n = 175)</b> | <b>(n = 11)</b>  | <b>(n = 10)</b>  | <b>(n = 4)</b>   | <b>(n = 17)</b>  | <b>non-MTX</b>   |
|                                                    |                  |                  |                  |                  |                  | <b>csDMARDs</b>  |
|                                                    |                  |                  |                  |                  |                  | <b>(n = 42)</b>  |
| <b>Deaths</b>                                      | 0                | 0                | 1 (10.0)         | 0                | NR               | 1 (2.4)          |
| <b>SAEs</b>                                        | 16 (9.1)         | 1 (9.1)          | 2 (20.0)         | 2 (50.0)         | NR               | 5 (11.9)         |
| <b>Related SAEs</b>                                | 4 (2.3)          | 0                | 0                | 1 (25.0)         | NR               | 1 (2.4)          |
| <b>Discontinuations due to</b>                     | 3 (1.7)          | 0                | 2 (20.0)         | 2 (50.0)         | NR               | 4 (9.5)          |
| <b>SAEs</b>                                        |                  |                  |                  |                  |                  |                  |
| <b>AEs</b>                                         | 139 (79.4)       | 6 (54.5)         | 7 (70.0)         | 3 (75.0)         | 14 (82.4)        | 30 (71.4)        |
| <b>Related AEs</b>                                 | 73 (41.7)        | 4 (36.4)         | 4 (40.0)         | 1 (25.0)         | 6 (35.3)         | 15 (35.7)        |
| <b>Discontinuations due to</b>                     | 5 (2.9)          | 0                | 2 (20.0)         | 2 (50.0)         | NR               | 4 (9.5)          |
| <b>AEs</b>                                         |                  |                  |                  |                  |                  |                  |
| <b><i>AEs of interest (system organ class)</i></b> |                  |                  |                  |                  |                  |                  |

|                                                       |                  |                  |                  |                  |                  |                  |
|-------------------------------------------------------|------------------|------------------|------------------|------------------|------------------|------------------|
| <b>Infections and infestations</b>                    | 67 (38.3)        | 3 (27.3)         | 1 (10.0)         | 2 (50.0)         | 11 (64.7)        | 17 (40.5)        |
| <b>Skin and subcutaneous tissue disorders</b>         | 27 (15.4)        | 1 (9.1)          | 2 (20.0)         | 1 (25.0)         | 3 (17.6)         | 7 (16.7)         |
| <b>Eye disorders</b>                                  | 8 (4.6)          | 0                | 1 (10.0)         | 0                | 1 (5.9)          | 2 (4.8)          |
| <b>Cardiac disorders</b>                              | 7 (4.0)          | 1 (9.1)          | 3 (30.0)         | 0                | 1 (5.9)          | 5 (11.9)         |
| <b>Blood and lymphatic system disorders</b>           | 2 (1.1)          | 0                | 1 (10.0)         | 1 (25.0)         | 1 (5.9)          | 3 (7.1)          |
| <b>Immune system disorders</b>                        | 2 (1.1)          | 1 (9.1)          | 0                | 0                | –                | 1 (2.4)          |
| <b>Neoplasms (benign, malignant, and unspecified)</b> | 3 (1.7)          | 0                | 1 (10.0)         | 1 (25.0)         | –                | 2 (4.8)          |
| <b>ASSURE</b>                                         |                  |                  |                  |                  |                  |                  |
|                                                       | <b>ABA + MTX</b> | <b>ABA + HCQ</b> | <b>ABA + SSZ</b> | <b>ABA + AZA</b> | <b>ABA + LEF</b> | <b>ABA + all</b> |
|                                                       | <b>(n = 535)</b> | <b>(n = 35)</b>  | <b>(n = 36)</b>  | <b>(n = 10)</b>  | <b>(n = 62)</b>  | <b>non-MTX</b>   |

|                                                    | <b>csDMARDs</b>  |           |           |          |           |            |
|----------------------------------------------------|------------------|-----------|-----------|----------|-----------|------------|
|                                                    | <b>(n = 143)</b> |           |           |          |           |            |
| <b>Deaths</b>                                      | 3 (0.6)          | 0         | 0         | 0        | 1 (1.6)   | 1 (0.7)    |
| <b>SAEs</b>                                        | 54 (10.1)        | 4 (11.4)  | 4 (11.1)  | 1 (10.0) | 15 (24.2) | 24 (16.8)  |
| <b>Related SAEs</b>                                | 9 (1.7)          | 0         | 1 (2.8)   | 1 (10.0) | 4 (6.5)   | 6 (4.2)    |
| <b>Discontinuations due to SAEs</b>                | 12 (2.2)         | 0         | 0         | 0        | 4 (6.5)   | 4 (2.8)    |
| <b>AEs</b>                                         | 480 (89.7)       | 32 (91.4) | 31 (86.1) | 8 (80.0) | 56 (90.3) | 127 (88.8) |
| <b>Related AEs</b>                                 | 299 (55.9)       | 20 (57.1) | 21 (58.3) | 5 (50.0) | 37 (59.7) | 83 (58.0)  |
| <b>Discontinuations due to AEs</b>                 | 28 (5.2)         | 0         | 2 (5.6)   | 0        | 6 (9.7)   | 8 (5.6)    |
| <b><i>AEs of interest (system organ class)</i></b> |                  |           |           |          |           |            |
| <b>Infections and infestations</b>                 | 292 (54.6)       | 24 (68.6) | 17 (47.2) | 5 (50.0) | 44 (71.0) | 90 (62.9)  |
| <b>Skin and subcutaneous tissue disorders</b>      | 133 (24.9)       | 5 (14.3)  | 9 (25.0)  | 3 (30.0) | 20 (32.3) | 37 (25.9)  |
| <b>Eye disorders</b>                               | 45 (8.4)         | 4 (11.4)  | 4 (11.1)  | 3 (30.0) | 11 (17.7) | 22 (15.4)  |

|                                                       |          |         |          |          |          |          |
|-------------------------------------------------------|----------|---------|----------|----------|----------|----------|
| <b>Cardiac disorders</b>                              | 28 (5.2) | 1 (2.9) | 3 (8.3)  | 0        | 7 (11.3) | 11 (7.7) |
| <b>Blood and lymphatic system disorders</b>           | 28 (5.2) | 2 (5.7) | 4 (11.1) | 1 (10.0) | 3 (4.8)  | 10 (7.0) |
| <b>Immune system disorders</b>                        | 13 (2.4) | 0       | 1 (2.8)  | 0        | 4 (6.5)  | 5 (3.5)  |
| <b>Neoplasms (benign, malignant, and unspecified)</b> | 20 (3.7) | 2 (5.7) | 0        | 0        | 1 (1.6)  | 3 (2.1)  |

---

**ARRIVE**

---

|                     | <b>ABA + MTX<br/>(n = 490)</b> | <b>ABA + HCQ<br/>(n = 49)</b> | <b>ABA + SSZ<br/>(n = 32)</b> | <b>ABA + AZA<br/>(n = 30)</b> | <b>ABA + LEF<br/>(n = 65)</b> | <b>ABA + all<br/>non-MTX<br/>csDMARDs<br/>(n = 176)</b> |
|---------------------|--------------------------------|-------------------------------|-------------------------------|-------------------------------|-------------------------------|---------------------------------------------------------|
| <b>Deaths</b>       | 1 (0.2)                        | 0                             | 0                             | 0                             | 0                             | 0                                                       |
| <b>SAEs</b>         | 45 (9.2)                       | 5 (10.2)                      | 3 (9.4)                       | 2 (6.7)                       | 3 (4.6)                       | 13 (7.4)                                                |
| <b>Related SAEs</b> | 14 (2.9)                       | 0                             | 0                             | 0                             | 1 (1.5)                       | 1 (0.6)                                                 |

|                                     |            |           |           |           |           |            |
|-------------------------------------|------------|-----------|-----------|-----------|-----------|------------|
| <b>Discontinuations due to SAEs</b> | 7 (1.4)    | 0         | 0         | 0         | 1 (1.5)   | 1 (0.6)    |
| <b>AEs</b>                          | 383 (78.2) | 39 (79.6) | 20 (62.5) | 27 (90.0) | 45 (69.2) | 131 (74.4) |
| <b>Related AEs</b>                  | 217 (44.3) | 19 (38.8) | 9 (28.1)  | 14 (46.7) | 25 (38.5) | 67 (38.1)  |
| <b>Discontinuations due to AEs</b>  | 20 (4.1)   | 2 (4.1)   | 1 (3.1)   | 1 (3.3)   | 3 (4.6)   | 7 (4.0)    |

---

***AEs of interest (system organ class)***

---

|                                               |            |           |          |           |           |           |
|-----------------------------------------------|------------|-----------|----------|-----------|-----------|-----------|
| <b>Infections and infestations</b>            | 203 (41.4) | 14 (28.6) | 8 (25.0) | 14 (46.7) | 27 (41.5) | 63 (35.8) |
| <b>Skin and subcutaneous tissue disorders</b> | 61 (12.4)  | 8 (16.3)  | 2 (6.3)  | 8 (26.7)  | 6 (9.2)   | 24 (13.6) |
| <b>Eye disorders</b>                          | 24 (4.9)   | 3 (6.1)   | 0        | 0         | 3 (4.6)   | 6 (3.4)   |
| <b>Cardiac disorders</b>                      | 16 (3.3)   | 0         | 3 (9.4)  | 1 (3.3)   | 1 (1.5)   | 5 (2.8)   |
| <b>Blood and lymphatic system disorders</b>   | 10 (2.0)   | 0         | 2 (6.3)  | 0         | 1 (1.5)   | 3 (1.7)   |
| <b>Immune system disorders</b>                | 7 (1.4)    | 0         | 1 (3.1)  | 1 (3.3)   | 2 (3.1)   | 4 (2.3)   |

|                                                            |         |   |   |   |         |         |
|------------------------------------------------------------|---------|---|---|---|---------|---------|
| <b>Neoplasms benign,<br/>malignant and<br/>unspecified</b> | 6 (1.2) | 0 | 0 | 0 | 2 (3.1) | 2 (1.1) |
|------------------------------------------------------------|---------|---|---|---|---------|---------|

---

All data are n (%)

ABA, abatacept; AE, adverse event; AZA, azathioprine; csDMARD, conventional synthetic disease-modifying antirheumatic drug; HCQ, hydroxychloroquine; LEF, leflunomide; MTX, methotrexate; NR, not reported; SAE, serious adverse event; SSZ sulfasalazine.
